# Supplementary material for: Mechanism of gu-ben-hua-shi (AESS) formula regulating autophagy through Hippo-YAP pathway in restoring the skin barrier in atopic dermatitis
Source: Research Square preprint supplement (doi:10.21203/rs.3.rs-8824770/v1), 2026-02-22
Supplement: Supplementary file 1 [file 48dbd9db0177d97389b4bff8.docx]

**Supplementary Tables**

**Table S1**

The sequences of siRNAs/shRNAs used in this study.

| Name | Sequences |
| --- | --- |
| si-YAP/shYAP | F：5’-CUGCCACCAAGCUAGAUAATT-3’  R：5’-UUAUCUAGCUUGGUGGCAGTT-3’ |
| Negative control | F：5’-GCGACGAUCUGCCUAAGAUTT-3’  R：5’-AUCUUAGGCAGAUCGUCGCTT-3’ |

siRNA: short interfering RNAs; shRNAs: short hairpin RNAs.

**Table S2**

The dermatitis score and ear thickness of the mice.

| Group | dermatitis score | | | ear thickness（mm） | | |
| --- | --- | --- | --- | --- | --- | --- |
| male | | female | male | female | |
| Ctrl | 0 | 0 | | 0.150±0.012 | | 0153±0.012 |
| AD | 4.000±1.000 | 3.667±1.528 | | 0.207±0.021 | | 0.210±0.010 |
| AD+0.5 AESS | 3.667±0.577 | 4.333±1.155 | | 0.200±0.010 | | 0.203±0.006 |
| AD+AESS | 2.000±1.000 | 1.667±0.577 | | 0.183±0.006 | | 0.177±0.006 |
| AD+2 AESS | 1.667±0.577 | 1.000±0.000 | | 0.173±0.006 | | 0.163±0.006 |
| AD+sh-YAP+AESS | 4.333±1.155 | 4.000±1.000 | | 0.237±0.015 | | 0.237±0.116 |
| AD+DEX | 1.333±0.577 | 1.000±0.000 | | 0.153±0.006 | | 0.170±0.010 |

Ctrl: control mice; AD, atopic dermatitis model mice; AD+0.5 AESS: mice intragastrically administered of 1/2 of the standard dose of AESS formula; AD + AESS: mice intragastrically administered the standard dose of AESS formula; AD +2 AESS: mice intragastrically administered of 2 times of the standard dose of AESS formula; AD + sh-YAP + AESS: mice of the AD + AESS group injected with shRNA-YAP lentivirus; AD + DEX: mice intragastrically administered 3 mg/kg dexamethasone.

**Table S3**

Trans Epidermal Water Loss (TEWL) of the mice (g/m2hr).

| Group | Week 1 | | Week 2 | | Week 3 | |
| --- | --- | --- | --- | --- | --- | --- |
| male | female | male | female | male | female |
| Ctrl | 6.222±0.509 | 6.556±0.193 | 6.889±0.385 | 6.889±0.385 | 6.889±0.385 | 6.666±0.577 |
| AD | 6.889±1.071 | 6.556±0.839 | 10.778±0.962 | 11.556±1.836 | 17.444±1.644 | 16.778±1.503 |
| AD+0.5 AESS | 7.222±1.018 | 6.667±1.334 | 9.778±1.262 | 9.111±0.770 | 15.111±0.509 | 14.555±0.694 |
| AD+AESS | 6.556±0.839 | 6.889±0.694 | 8.667±0.577 | 7.222±0.509 | 10.556±0.839 | 11.000±2.309 |
| AD+2 AESS | 6.111±0.694 | 6.556±0.770 | 6.333±0.882 | 6.111±0.509 | 8.000±0.333 | 8.222±1.262 |
| AD+sh-YAP  +AESS | 7.111±0.385 | 7.111±0.694 | 12.556±0.839 | 12.000±2.082 | 18.778±0.509 | 18.778±0.509 |
| AD+DEX | 7.667±0.334 | 7.778±0.962 | 11.778±1.018 | 11.778±1.575 | 18.111±0.509 | 17.667±1.667 |

Ctrl: control mice; AD, atopic dermatitis model mice; AD+0.5 AESS: mice intragastrically administered of 1/2 of the standard dose of AESS formula; AD + AESS: mice intragastrically administered the standard dose of AESS formula; AD +2 AESS: mice intragastrically administered of 2 times of the standard dose of AESS formula; AD + sh-YAP + AESS: mice of the AD + AESS group injected with shRNA-YAP lentivirus; AD + DEX: mice intragastrically administered 3 mg/kg dexamethasone.

**Table S4**

Stratum corneum hydration (SCH) of the mice (a.u.).

| Group | Week 1 | | | Week 2 | | | Week 3 | | |
| --- | --- | --- | --- | --- | --- | --- | --- | --- | --- |
| male | female | | male | female | | male | female | |
| Ctrl | 20.444±1.836 | | 20.334±0.577 | 20.444±0.193 | | 21.889±1.347 | 20.222±0.509 | | 19.778±0.770 |
| AD | 18.111±1.071 | | 19.222±1.388 | 15.222±0.509 | | 14.889±1.071 | 12.111±0.385 | | 10.111±0.694 |
| AD+0.5 AESS | 19.333±0.882 | | 19.333±1.000 | 15.889±1.678 | | 16.666±1.155 | 12.000±1.528 | | 11.222±0.839 |
| AD+AESS | 19.667±1.000 | | 20.556±0.839 | 19.333±1.000 | | 18.556±0.193 | 16.556±0.839 | | 16.111±0.694 |
| AD+2 AESS | 20.444±1.018 | | 19.667±0.667 | 19.778±0.694 | | 19.889±0.839 | 18.333±0.667 | | 18.666±1.155 |
| AD+sh-YAP  +AESS | 19.334±1.155 | | 19.444±0.839 | 12.000±1.528 | | 12.778±1.895 | 8.889±0.694 | | 8.111±1.071 |
| AD+DEX | 18.556±0.509 | | 18.778±0.509 | 14.222±0.509 | | 14.222±0.694 | 10.444±0.509 | | 10.333±0.882 |

Ctrl: control mice; AD, atopic dermatitis model mice; AD+0.5 AESS: mice intragastrically administered of 1/2 of the standard dose of AESS formula; AD + AESS: mice intragastrically administered the standard dose of AESS formula; AD +2 AESS: mice intragastrically administered of 2 times of the standard dose of AESS formula; AD + sh-YAP + AESS: mice of the AD + AESS group injected with shRNA-YAP lentivirus; AD + DEX: mice intragastrically administered 3 mg/kg dexamethasone.

**Supplementary Figures**

**Fig. S1.** UPLC-MS/MS chromatograms of main prototypes and metabolites in drug-containing serum.

**
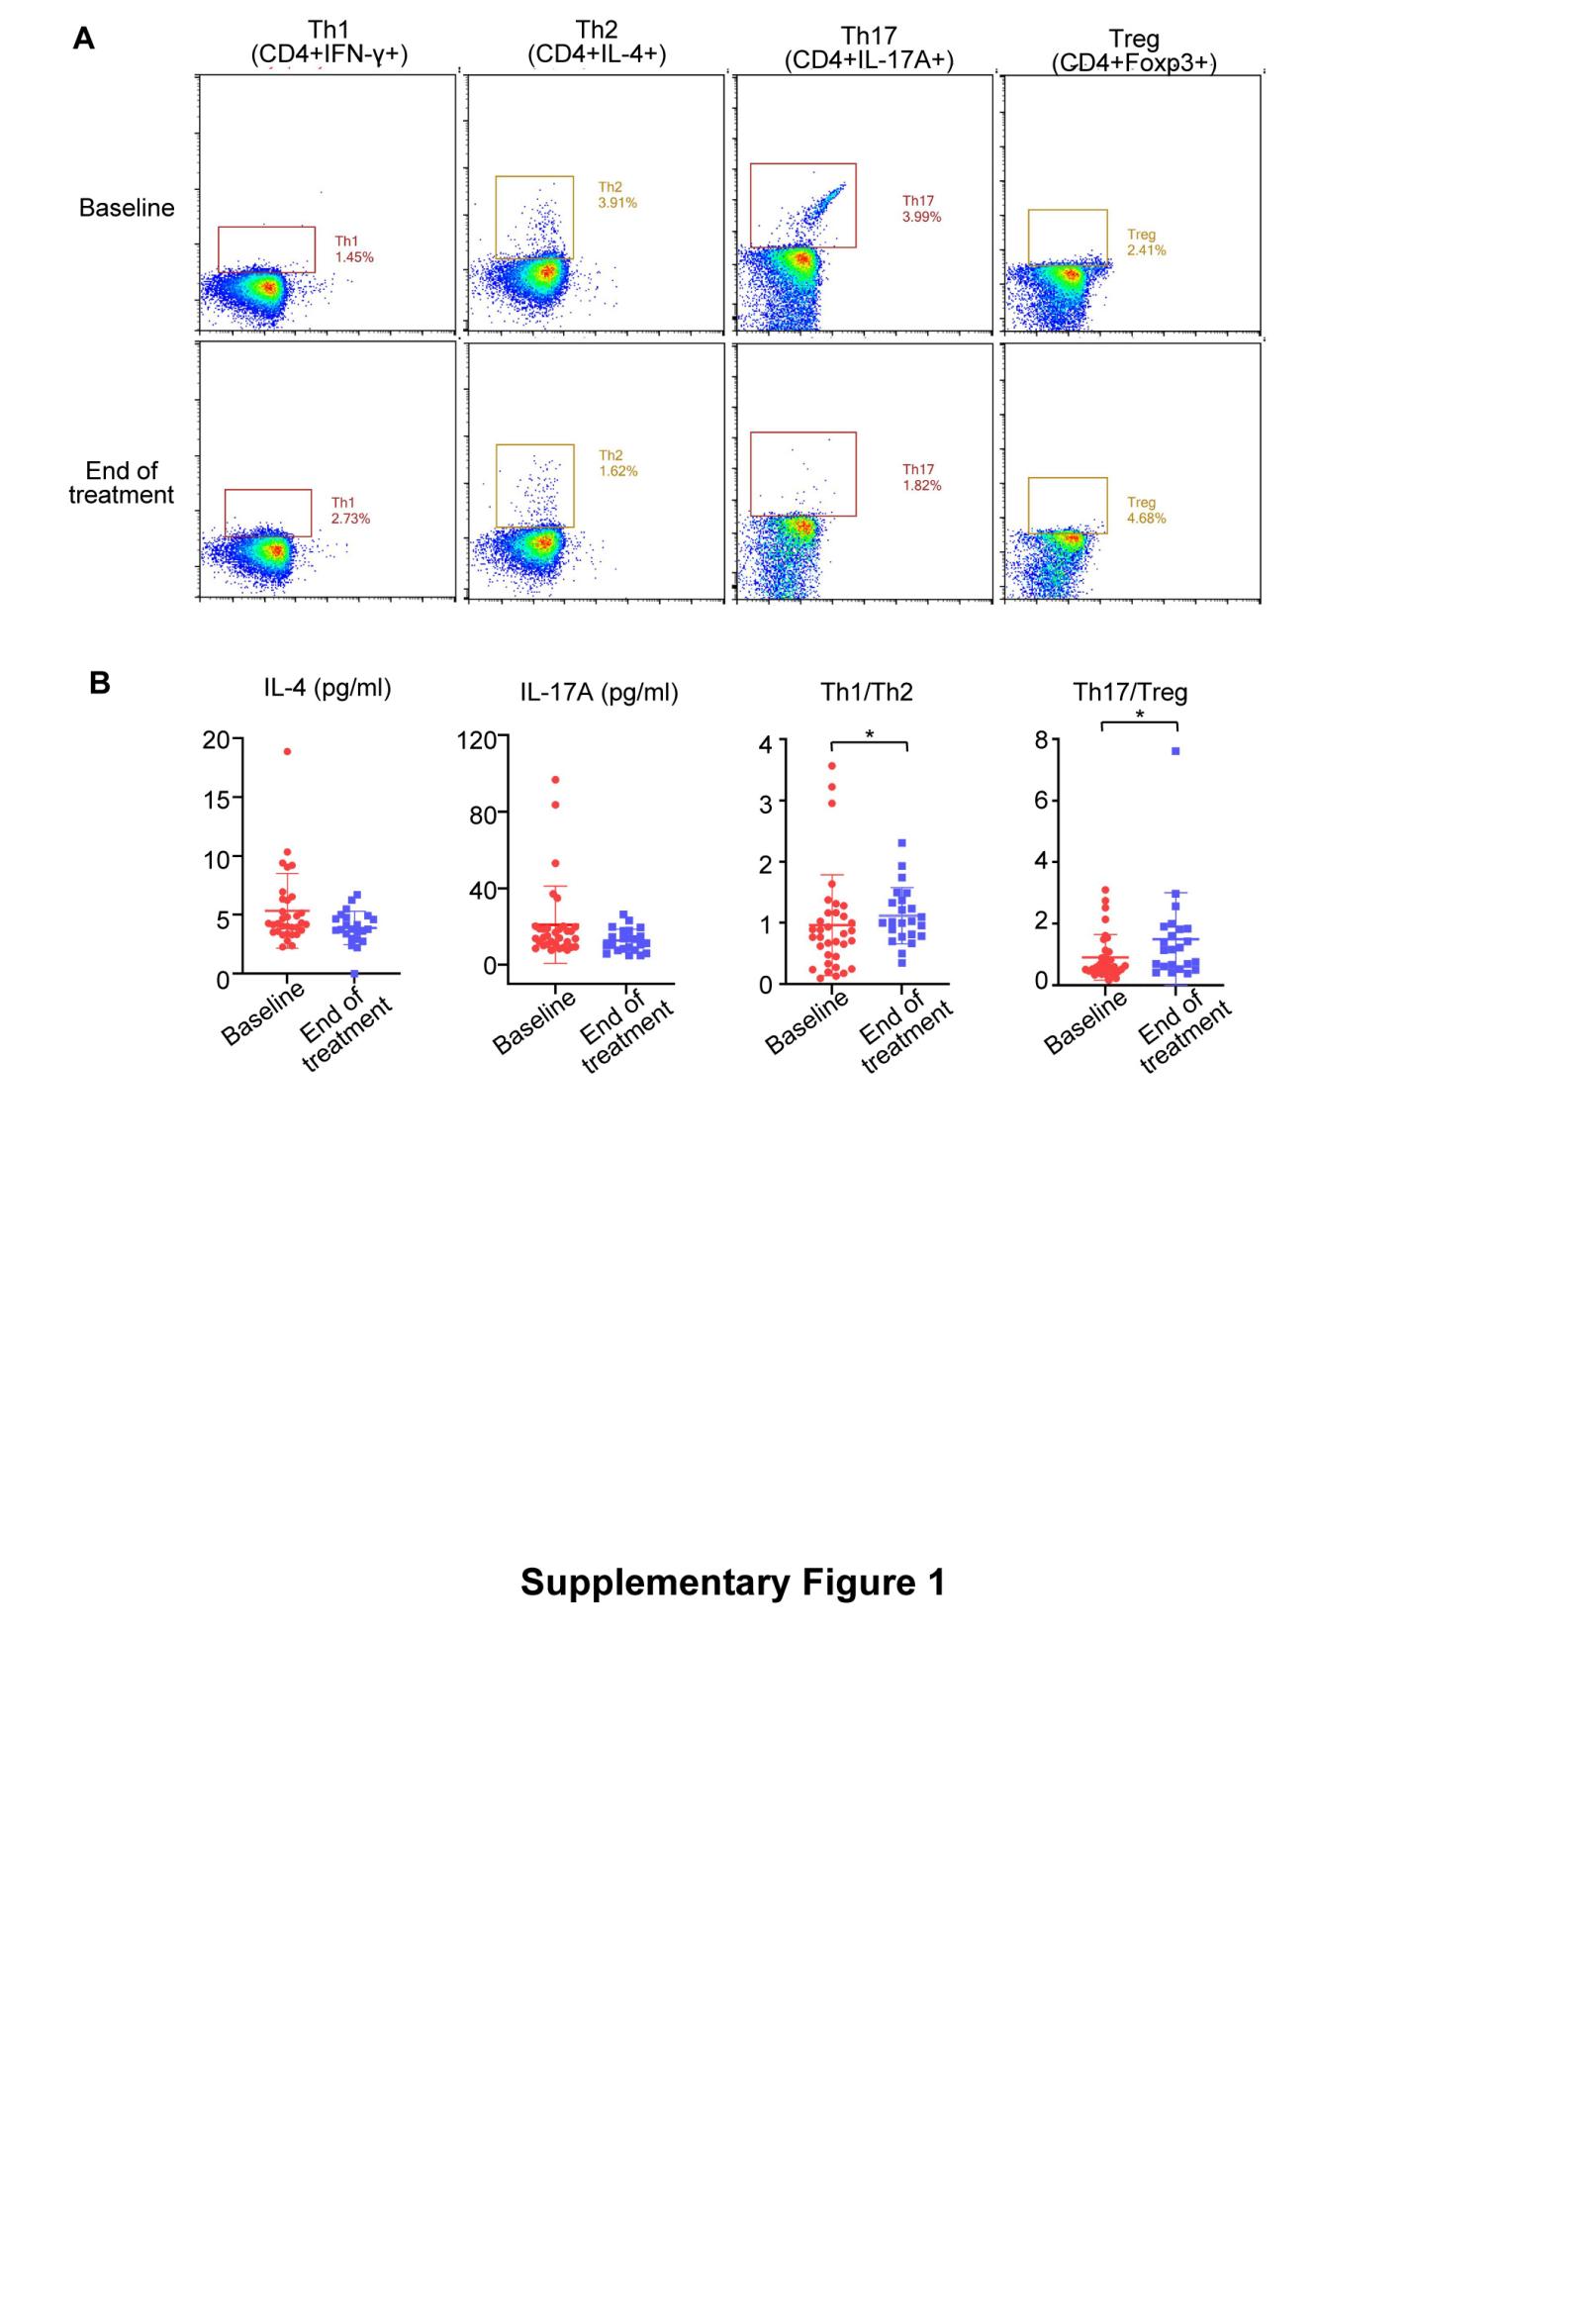
Fig. S2.** The effect of gu-ben-hua-shi (AESS) on inflammatory disorder in atopic dermatitis (AD) patients. (A) Flow cytometry results from the clinical patients before/after AESS treatment. (B) Scatter plot of IL-4, IL-17A, Th1/Th2 and Th17/Treg of the clinical patients before/after AESS treatment. **P*<0.05 *v.s.* Baseline


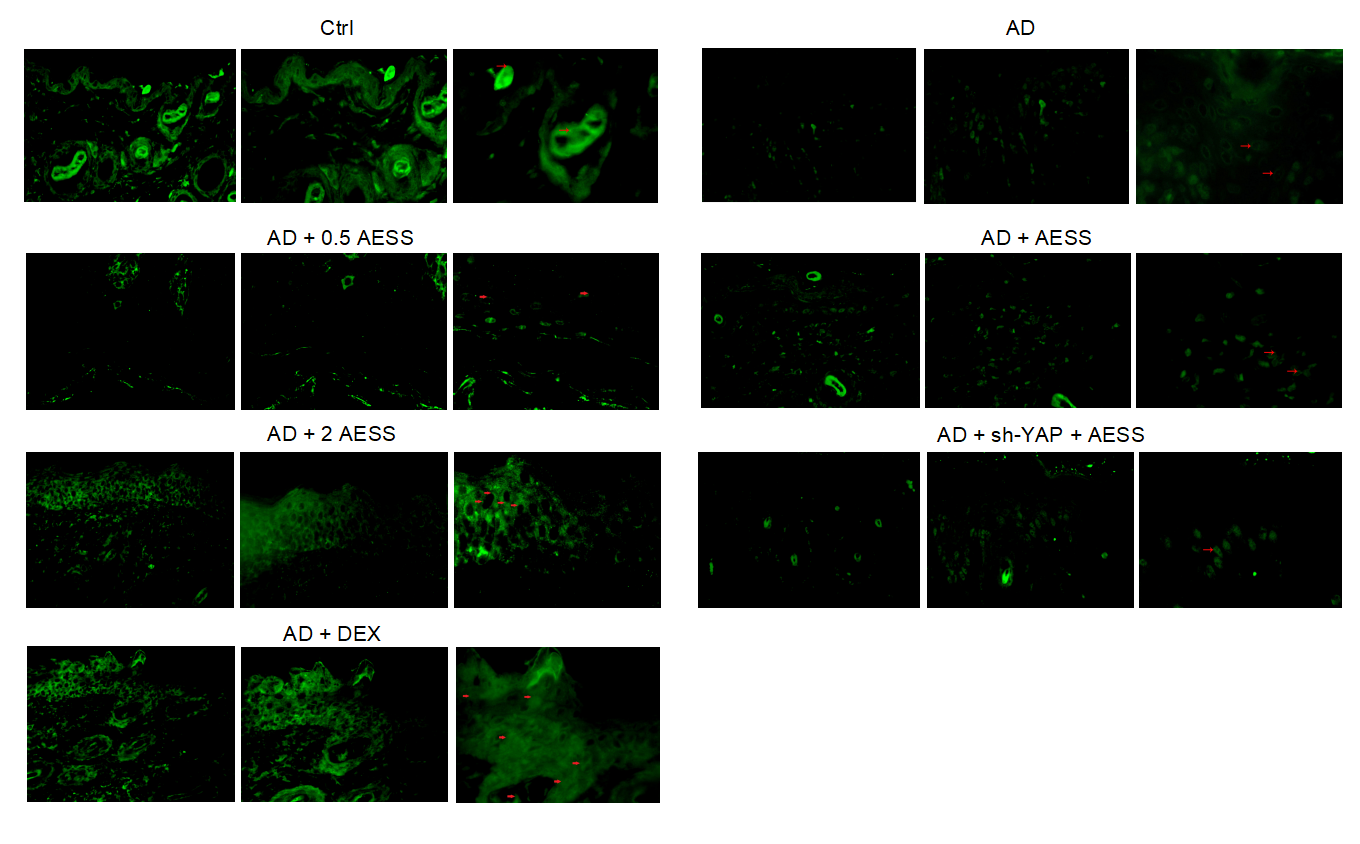
**Fig. S3.** The effect of gu-ben-hua-shi (AESS) on autophagy in atopic dermatitis (AD) mice models. (A) LC3 positive cells in mice skin lesions from immunofluorescence (left: 400×; middle: 600×; right:1000×, red arrows indicate LC3 fluorescent points). Ctrl: control mice; AD, atopic dermatitis model mice; AD+0.5 AESS: mice intragastrically administered of 1/2 of the standard dose of AESS formula; AD + AESS: mice intragastrically administered the standard dose of AESS formula; AD +2 AESS: mice intragastrically administered of 2 times of the standard dose of AESS formula; AD +sh-YAP + AESS: mice of the AD + AESS group injected with shRNA-YAP lentivirus; AD + DEX: mice intragastrically administered 3 mg/kg dexamethasone.


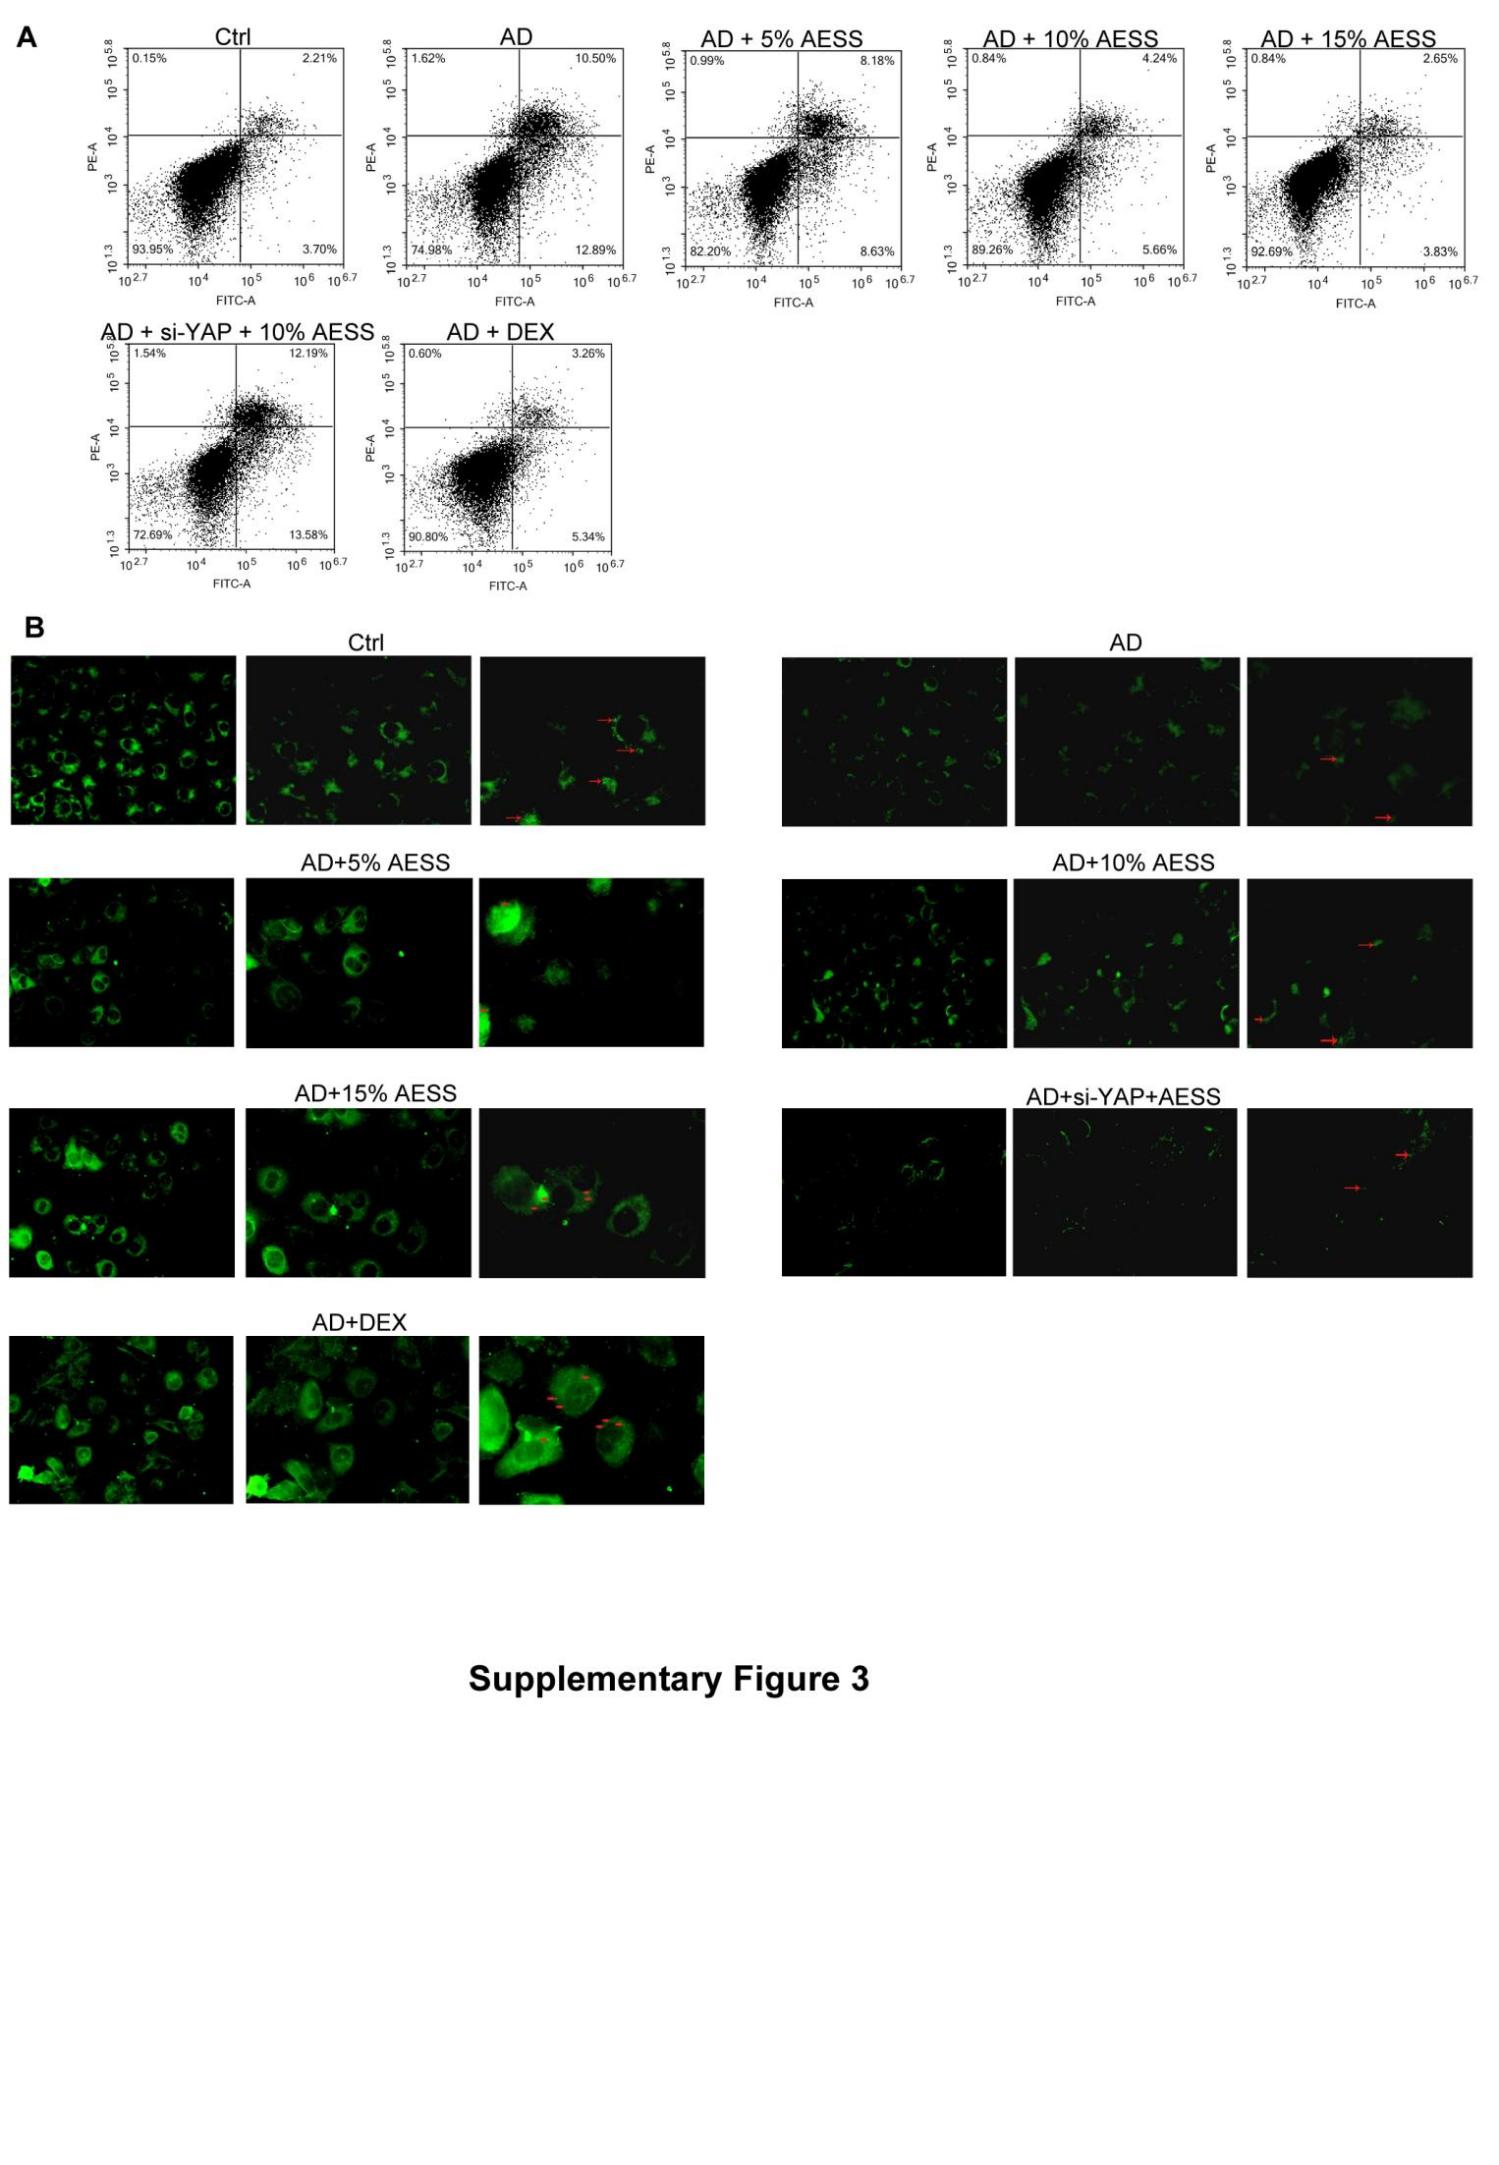
**Fig. S4.** The effect of gu-ben-hua-shi (AESS) on atopic dermatitis (AD) like inflammatory cell model. (A) Flow cytometry analysis of cell apoptosis rate results. (B) LC3 positive cells in cells from immunofluorescence (left: 400×; middle: 600×; right:1000×, red arrows indicate LC3 fluorescent points). Ctrl: control cells; AD: atopic dermatitis like inflammatory cells; AD+5% AESS: AD-like cells cultured with 5% AESS contained serum; AD+10% AESS: AD-like cells cultured with 10% AESS contained serum; AD+15% AESS: AD-like cells cultured with 15% AESS contained serum; AD+si-YAP+10% AESS: cells of the AD+10% AESS group transfected with YAP si-RNA; AD+DEX: AD-like cells cultured with 20 μg/mL dexamethasone.

**Supplementary Methods**

**Chemical analysis of gu-ben-hua-shi formula (AESS)**

The characteristic fingerprint of gu-ben-hua-shi formula (AESS) was developed by using high performance liquid chromatography/tandem mass spectrometry (UPLC-MS/MS). UPLC-MS/MS technology was carried out by Dionex Ultimate HPLC 3000 coupled with QE-Orbitrap mass spectrometer was used in the analytical method development (Thermo-Fisher, USA), and the separation was performed on Hypersil GOLD column (2.1×100 mm, 1.9 μm). Mobile phase: 0.1% formic acid water (A)–acetonitrile (B). Gradient elution: 0–2 min, 5% B; 2–42 min, 5–95%B; 42–47 min, 95%B; 47–47.1 min, 95–5%B; 47.1–50 min, 5%B. Flow rate: 0.3 mL/min. The sample injection volume was 5 μL., and the column temperature was maintained at 40°C throughout the analysis period. The mass spectrometer was equipped with an electrospray ionization (ESI) interface operated in both positive and negative ion mode. Scanning range: 100.0–1500.0 m/z. Ion source temperature: 320℃; The resolution was set at 70,000; The capillary voltage was 3.5 kV in positive ion mode and 3.2 kV in negative ion mode.

**Sample size calculation**

Based on previous studies (Ping, 2021), the threshold was set at 70% and the expected value was set at 90%. Under these conditions, α= 0.05, β= 0.2, significance level of 0.05 and 80% power (PASS statistic software, version 15.0, NCSS), the total sample size was 26 patients, and assuming a dropout rate of 20% by considering ineligible subjects, a total of 34 individuals were included in the study.

**Reference**

Jia J, Feng L, Ye S, Ping R, Mo X, Zhang Y, Li X, Chen D. 2022. Therapeutic effect of chinese herbal medicine gu-ben-hua-shi (AESS) formula on atopic dermatitis through regulation of yes-associated protein. Front. Pharmacol. 13, 929580.

Ping RY. 2021. An exploratory study on the metabolomics of patients with eczema and the effect of Gubenhuashi Decoction on eczema and metabolomics [phd’s thesis], Guangzhou University of Chinese Medicine.
